# Supplementary material for: Autoantibodies associated with systemic sclerosis in three autoimmune diseases imprinted by type I interferon gene dysregulation: a comparison across SLE, primary Sjögren’s syndrome and systemic sclerosis
Source: PubMed Central journal article supplement — Lupus Sci Med. 2022 Dec 29;9(1):e000732. doi: 10.1136/lupus-2022-000732 (PMC9806068; doi:10.1136/lupus-2022-000732), 2022-12-29
Supplement: lupus-2022-000732supp001.pdf [file lupus-2022-000732supp001.pdf]

**Supplementary Table 1.** Number of individuals positive with EuroLine for each specificity among HBD ( $n=236$ ), SLE discovery ( $n=282$ ) and SLE replication ( $n=228$ ) cohorts, pSS ( $n=116$ ) and SSc ( $n=57$ ). SI values for the specificities are presented in median SI units and range.

| Specificity               | Cohort           | Positive individuals, (n) | Signal intensity (SI), median (range) |
|---------------------------|------------------|---------------------------|---------------------------------------|
| <b>Scl-70</b>             | HBD              | 2                         | 12.5 (12–13)                          |
|                           | SLE: Discovery   | 3                         | 16 (12–42)                            |
|                           | SLE: Replication | 4                         | 17 (14–58)                            |
|                           | pSS              | 0                         |                                       |
|                           | SSc              | 12                        | 76.5 (11–116)                         |
| <b>CENP-A</b>             | HBD              | 1                         | 23 (23–23)                            |
|                           | SLE: Discovery   | 17                        | 23 (11–135)                           |
|                           | SLE: Replication | 17                        | 22 (11–142)                           |
|                           | pSS              | 12                        | 122 (12–145)                          |
|                           | SSc              | 12                        | 139.5 (48–150)                        |
| <b>CENP-B</b>             | HBD              | 4                         | 16.5 (12–37)                          |
|                           | SLE: Discovery   | 8                         | 19.5 (11–122)                         |
|                           | SLE: Replication | 7                         | 36 (13–133)                           |
|                           | pSS              | 11                        | 106 (14–142)                          |
|                           | SSc              | 14                        | 141 (28–153)                          |
| <b>RNA Pol III 11kDa</b>  | HBD              | 4                         | 35.5 (24–40)                          |
|                           | SLE: Discovery   | 2                         | 12 (11–13)                            |
|                           | SLE: Replication | 6                         | 14.5 (13–40)                          |
|                           | pSS              | 1                         | 15 (15–15)                            |
|                           | SSc              | 12                        | 99 (15–130)                           |
| <b>RNA Pol III 155kDa</b> | HBD              | 4                         | 25 (16–37)                            |
|                           | SLE: Discovery   | 2                         | 20 (16–24)                            |
|                           | SLE: Replication | 5                         | 16 (13–29)                            |
|                           | pSS              | 0                         |                                       |
|                           | SSc              | 15                        | 78 (15–131)                           |
| <b>Fibrillarin</b>        | HBD              | 4                         | 16 (13–53)                            |
|                           | SLE: Discovery   | 2                         | 15.5 (14–17)                          |
|                           | SLE: Replication | 6                         | 14 (11–88)                            |
|                           | pSS              | 0                         |                                       |
|                           | SSc              | 2                         | 21 (17–25)                            |
| <b>NOR90</b>              | HBD              | 5                         | 13 (11–52)                            |
|                           | SLE: Discovery   | 14                        | 37.5 (14–94)                          |
|                           | SLE: Replication | 4                         | 19.5 (13–31)                          |
|                           | pSS              | 5                         | 30 (11–138)                           |
|                           | SSc              | 3                         | 13 (13–95)                            |

|                  |                         |    |              |
|------------------|-------------------------|----|--------------|
| <b>Th/To</b>     | <i>HBD</i>              | 14 | 14.5 (11–60) |
|                  | <i>SLE: Discovery</i>   | 4  | 13 (11–26)   |
|                  | <i>SLE: Replication</i> | 9  | 15 (11–38)   |
|                  | <i>pSS</i>              | 3  | 19 (16–21)   |
|                  | <i>SSc</i>              | 3  | 24 (14–27)   |
| <b>PM-Scl100</b> |                         |    |              |
|                  | <i>HBD</i>              | 9  | 23 (11–62)   |
|                  | <i>SLE: Discovery</i>   | 4  | 14 (11–30)   |
|                  | <i>SLE: Replication</i> | 7  | 13 (11–29)   |
|                  | <i>pSS</i>              | 3  | 12 (12–36)   |
|                  | <i>SSc</i>              | 9  | 56 (13–86)   |
| <b>PM-Scl75</b>  |                         |    |              |
|                  | <i>HBD</i>              | 16 | 14.5 (11–52) |
|                  | <i>SLE: Discovery</i>   | 9  | 16 (11–93)   |
|                  | <i>SLE: Replication</i> | 3  | 26 (12–145)  |
|                  | <i>pSS</i>              | 2  | 13 (11–15)   |
|                  | <i>SSc</i>              | 8  | 62 (11–142)  |
| <b>Ku</b>        |                         |    |              |
|                  | <i>HBD</i>              | 10 | 13.5 (12–19) |
|                  | <i>SLE: Discovery</i>   | 13 | 20 (11–122)  |
|                  | <i>SLE: Replication</i> | 16 | 26 (12–132)  |
|                  | <i>pSS</i>              | 2  | 67 (30–104)  |
|                  | <i>SSc</i>              | 6  | 32.5 (11–90) |
| <b>PDGFR</b>     |                         |    |              |
|                  | <i>HBD</i>              | 0  |              |
|                  | <i>SLE: Discovery</i>   | 0  |              |
|                  | <i>SLE: Replication</i> | 0  |              |
|                  | <i>pSS</i>              | 0  |              |
|                  | <i>SSc</i>              | 0  |              |

**Supplementary Table 2.** Comparisons between immunoassays. All samples achieving positive test results with EuroLine (reference assay) were evaluated with BlueDot and EliA™. Results are shown in total and for each specificity in signal intensity (SI) intervals. Highest agreement of positive results was found at SI units >50, and for anti-CENP-B followed by anti-CENP-A.

|                           |                 | Number of positive antibodies and agreement with EuroLine, n (%) | Signal intensity (SI), units |        |         |
|---------------------------|-----------------|------------------------------------------------------------------|------------------------------|--------|---------|
|                           |                 |                                                                  | 11–25                        | 26–50  | >50     |
| <b>Total</b>              | <i>EuroLine</i> | 266                                                              | 164                          | 49     | 53      |
|                           | <i>BlueDot</i>  | 48 (18)                                                          | 4 (2)                        | 5 (10) | 39 (74) |
|                           | <i>EuroLine</i> | 97                                                               | 61                           | 19     | 17      |
|                           | <i>EliA</i>     | 18 (19)                                                          | 2 (3)                        | 3 (16) | 13 (76) |
| <b>Scl-70</b>             |                 |                                                                  |                              |        |         |
|                           | <i>EuroLine</i> | 9                                                                | 7                            | 1      | 1       |
|                           | <i>BlueDot</i>  | 0                                                                | 0                            | 0      | 0       |
|                           | <i>EliA</i>     | 1 (11)                                                           | 0                            | 0      | 1       |
| <b>CENP-A</b>             |                 |                                                                  |                              |        |         |
|                           | <i>EuroLine</i> | 44                                                               | 20                           | 7      | 17      |
|                           | <i>BlueDot</i>  | 13 (30)                                                          | 0                            | 0      | 13      |
| <b>CENP-B</b>             |                 |                                                                  |                              |        |         |
|                           | <i>EuroLine</i> | 30                                                               | 12                           | 5      | 13      |
|                           | <i>BlueDot</i>  | 17 (57)                                                          | 2                            | 2      | 13      |
|                           | <i>EliA</i>     | 16 (53)                                                          | 2                            | 2      | 12      |
| <b>RNA Pol III 11kDa</b>  |                 |                                                                  |                              |        |         |
|                           | <i>EuroLine</i> | 13                                                               | 9                            | 4      | 0       |
|                           | <i>BlueDot*</i> | 1 (8)                                                            | 1                            | 0      | 0       |
|                           | <i>EliA*</i>    | 0                                                                | 0                            | 0      | 0       |
| <b>RNA Pol III 155kDa</b> |                 |                                                                  |                              |        |         |
|                           | <i>EuroLine</i> | 11                                                               | 7                            | 4      | 0       |
|                           | <i>BlueDot*</i> | 0                                                                | 0                            | 0      | 0       |
|                           | <i>EliA*</i>    | 0                                                                | 0                            | 0      | 0       |
| <b>Fibrillarin</b>        |                 |                                                                  |                              |        |         |
|                           | <i>EuroLine</i> | 11                                                               | 9                            | 0      | 2       |
|                           | <i>BlueDot</i>  | 1 (9)                                                            | 1                            | 0      | 0       |
|                           | <i>EliA</i>     | 0                                                                | 0                            | 0      | 0       |
| <b>NOR90</b>              |                 |                                                                  |                              |        |         |
|                           | <i>EuroLine</i> | 27                                                               | 14                           | 8      | 5       |
|                           | <i>BlueDot</i>  | 3 (11)                                                           | 0                            | 0      | 3       |
| <b>Th/To</b>              |                 |                                                                  |                              |        |         |
|                           | <i>EuroLine</i> | 30                                                               | 24                           | 5      | 1       |
|                           | <i>BlueDot</i>  | 0                                                                | 0                            | 0      | 0       |
| <b>PM-Scl100</b>          |                 |                                                                  |                              |        |         |
|                           | <i>EuroLine</i> | 23                                                               | 17                           | 5      | 1       |
|                           | <i>BlueDot</i>  | 4 (17)                                                           | 0                            | 3      | 1       |
|                           | <i>EliA</i>     | 1 (4)                                                            | 0                            | 1      | 0       |
| <b>PM-Scl75</b>           |                 |                                                                  |                              |        |         |
|                           | <i>EuroLine</i> | 30                                                               | 22                           | 4      | 4       |
|                           | <i>BlueDot</i>  | 4 (13)                                                           | 0                            | 0      | 4       |
| <b>Ku</b>                 |                 |                                                                  |                              |        |         |
|                           | <i>EuroLine</i> | 38                                                               | 23                           | 6      | 9       |
|                           | <i>BlueDot</i>  | 5 (13)                                                           | 0                            | 0      | 5       |

\* In contrast to the EuroLine assay, the BlueDot and EliA™ assays detect antibodies against the entire RNA polymerase III complex.

**Supplementary Table 3.** Concordance of EuroLine results (reference assay) versus (vs.) BlueDot and EliA™ results in patients with SSc. For most specificities, BlueDot and EliA™ showed a high level of concordance with the EuroLine results.

|                                          | EuroLine<br>(n=57) | BlueDot<br>(n=57) | EuroLine<br>(n=56) | EliA™<br>(n=56) | Concordance:<br>EuroLine vs.<br>BlueDot | Concordance:<br>EuroLine vs.<br>EliA™ |
|------------------------------------------|--------------------|-------------------|--------------------|-----------------|-----------------------------------------|---------------------------------------|
| <b>All positive and negative results</b> |                    |                   |                    |                 | 94.4%                                   | 96.1%                                 |
| +                                        | 96                 | 63                | 62                 | 49              |                                         |                                       |
| -                                        | 531                | 529               | 274                | 274             |                                         |                                       |
| <b>ScI-70</b>                            |                    |                   |                    |                 | 98.2%                                   | 100.0%                                |
| +                                        | 12                 | 11                | 12                 | 12              |                                         |                                       |
| -                                        | 45                 | 45                | 44                 | 44              |                                         |                                       |
| <b>CENP-A</b>                            |                    |                   |                    |                 | 98.2%                                   |                                       |
| +                                        | 12                 | 11                |                    |                 |                                         |                                       |
| -                                        | 45                 | 45                |                    |                 |                                         |                                       |
| <b>CENP-B</b>                            |                    |                   |                    |                 | 96.5%                                   | 98.2%                                 |
| +                                        | 14                 | 12                | 14                 | 13              |                                         |                                       |
| -                                        | 43                 | 43                | 42                 | 42              |                                         |                                       |
| <b>RNA Pol III 11 kDa</b>                |                    |                   |                    |                 | 94.7%*                                  | 94.6%*                                |
| +                                        | 12                 | 9                 | 11                 | 8               |                                         |                                       |
| -                                        | 45                 | 45                | 45                 | 45              |                                         |                                       |
| <b>RNA Pol III 155 kDa</b>               |                    |                   |                    |                 | 89.5%*                                  | 89.3%*                                |
| +                                        | 15                 | 9                 | 14                 | 8               |                                         |                                       |
| -                                        | 42                 | 42                | 42                 | 42              |                                         |                                       |
| <b>Fibrillarin</b>                       |                    |                   |                    |                 | 96.5%                                   | 96.4%                                 |
| +                                        | 2                  | 0                 | 2                  | 0               |                                         |                                       |
| -                                        | 55                 | 55                | 54                 | 54              |                                         |                                       |
| <b>NOR90</b>                             |                    |                   |                    |                 | 93.0%                                   |                                       |
| +                                        | 3                  | 0                 |                    |                 |                                         |                                       |
| -                                        | 54                 | 53                |                    |                 |                                         |                                       |
| <b>Th/To</b>                             |                    |                   |                    |                 | 94.7%                                   |                                       |
| +                                        | 3                  | 0                 |                    |                 |                                         |                                       |
| -                                        | 54                 | 54                |                    |                 |                                         |                                       |
| <b>PM-ScI100</b>                         |                    |                   |                    |                 | 94.7%                                   | 98.2%                                 |
| +                                        | 9                  | 7                 | 9                  | 8               |                                         |                                       |
| -                                        | 48                 | 47                | 47                 | 47              |                                         |                                       |
| <b>PM-ScI75</b>                          |                    |                   |                    |                 | 91.2%                                   |                                       |
| +                                        | 8                  | 3                 |                    |                 |                                         |                                       |
| -                                        | 49                 | 49                |                    |                 |                                         |                                       |
| <b>Ku</b>                                |                    |                   |                    |                 | 91.2%                                   |                                       |
| +                                        | 6                  | 1                 |                    |                 |                                         |                                       |
| -                                        | 51                 | 51                |                    |                 |                                         |                                       |

\* Comparisons were done between antibody results of the entire RNA polymerase III complex (BlueDot and EliA™) vs. the 11 and 155 kDa antigens (EuroLine), respectively.

**Supplementary Table 4.** Diagnostic performance with RP as outcome based on data from individuals with SLE and HBD. Sensitivity, specificity, accuracy, positive predictive value (PPV), and negative predictive value (NPV) are detailed including 95% confidence intervals (in parentheses).

|                         | <b>Sensitivity</b> | <b>Specificity</b> | <b>Accuracy</b>  | <b>PPV</b>       | <b>NPV</b>       |
|-------------------------|--------------------|--------------------|------------------|------------------|------------------|
| IF-ANA                  | 0.62 (0.53–0.70)   | 0.61 (0.56–0.66)   | 0.70 (0.67–0.74) | 0.34 (0.28–0.41) | 0.83 (0.78–0.87) |
| Ro52/SSA                | 0.33 (0.26–0.42)   | 0.80 (0.76–0.84)   | 0.80 (0.76–0.82) | 0.36 (0.28–0.45) | 0.79 (0.74–0.82) |
| Scl-70                  | 0.01 (0–0.05)      | 0.99 (0.97–1)      | 0.85 (0.83–0.88) | 0.20 (0.01–0.62) | 0.75 (0.71–0.79) |
| CENP-A                  | 0.04 (0.02–0.09)   | 0.97 (0.95–0.98)   | 0.85 (0.82–0.87) | 0.31 (0.14–0.56) | 0.75 (0.71–0.79) |
| CENP-B                  | 0.02 (0–0.06)      | 0.98 (0.95–0.99)   | 0.85 (0.82–0.87) | 0.18 (0.05–0.48) | 0.75 (0.71–0.79) |
| RNA Pol III 11kDa       | 0.02 (0–0.06)      | 0.99 (0.97–1)      | 0.86 (0.83–0.88) | 0.33 (0.10–0.70) | 0.75 (0.71–0.79) |
| RNA Pol III 155kDa      | 0.01 (0–0.05)      | 0.99 (0.97–0.99)   | 0.85 (0.83–0.88) | 0.17 (0.01–0.56) | 0.75 (0.71–0.79) |
| Fibrillarin             | 0.01 (0–0.05)      | 0.99 (0.97–0.99)   | 0.85 (0.83–0.88) | 0.17 (0.01–0.56) | 0.75 (0.71–0.79) |
| NOR90                   | 0.02 (0–0.06)      | 0.96 (0.93–0.97)   | 0.84 (0.81–0.86) | 0.12 (0.03–0.34) | 0.75 (0.71–0.78) |
| Th/To                   | 0.02 (0–0.06)      | 0.96 (0.94–0.98)   | 0.84 (0.81–0.86) | 0.12 (0.03–0.36) | 0.75 (0.71–0.79) |
| PM-Scl100               | 0.03 (0.01–0.08)   | 0.98 (0.96–0.99)   | 0.85 (0.83–0.87) | 0.33 (0.14–0.61) | 0.75 (0.71–0.79) |
| PM-Scl75                | 0.04 (0.02–0.09)   | 0.95 (0.92–0.97)   | 0.84 (0.81–0.86) | 0.21 (0.09–0.40) | 0.75 (0.71–0.79) |
| Ku                      | 0.03 (0.01–0.08)   | 0.96 (0.93–0.97)   | 0.84 (0.81–0.86) | 0.20 (0.08–0.42) | 0.75 (0.71–0.79) |
| PDGFR                   | 0 (0–0.03)         | 1 (0.99–1)         | 0.86 (0.83–0.88) | –                | 0.75 (0.71–0.79) |
| ≥1 antibody specificity | 0.71 (0.62–0.78)   | 0.41 (0.36–0.46)   | 0.55 (0.50–0.59) | 0.28 (0.24–0.34) | 0.81 (0.75–0.86) |
